# Supplementary material for: X-chromosome target specificity diverged between dosage compensation mechanisms of two closely related Caenorhabditis species
Source: eLife journal article supplement (doi:10.7554/elife.85413), 2023-03-23

**Figure 1 – figure supplement 2**

**A Full-length SDC-2**

|                      | <i>C. briggsae</i> | <i>C. elegans</i> | <i>C. japonica</i> | <i>C. brenneri</i> | <i>C. tropicalis</i> |
|----------------------|--------------------|-------------------|--------------------|--------------------|----------------------|
| <i>C. briggsae</i>   |                    |                   |                    |                    |                      |
| <i>C. elegans</i>    | 26 (43)            |                   |                    |                    |                      |
| <i>C. japonica</i>   | 24 (39)            | 28 (45)           |                    |                    |                      |
| <i>C. brenneri</i>   | 24 (41)            | 27 (45)           | 23 (39)            |                    |                      |
| <i>C. tropicalis</i> | 27 (42)            | 26 (42)           | 24 (38)            | 29 (45)            |                      |

**SDC-2 N-terminal domain**

|                      | <i>C. briggsae</i> | <i>C. elegans</i> | <i>C. japonica</i> | <i>C. brenneri</i> | <i>C. tropicalis</i> |
|----------------------|--------------------|-------------------|--------------------|--------------------|----------------------|
| <i>C. briggsae</i>   |                    |                   |                    |                    |                      |
| <i>C. elegans</i>    | 38 (58)            |                   |                    |                    |                      |
| <i>C. japonica</i>   | 38 (59)            | 40 (58)           |                    |                    |                      |
| <i>C. brenneri</i>   | 39 (59)            | 40 (57)           | 36 (55)            |                    |                      |
| <i>C. tropicalis</i> | 42 (60)            | 40 (59)           | 39 (58)            | 45 (63)            |                      |

**SDC-2 C-terminal domain**

|                      | <i>C. briggsae</i> | <i>C. elegans</i> | <i>C. japonica</i> | <i>C. brenneri</i> | <i>C. tropicalis</i> |
|----------------------|--------------------|-------------------|--------------------|--------------------|----------------------|
| <i>C. briggsae</i>   |                    |                   |                    |                    |                      |
| <i>C. elegans</i>    | 32 (51)            |                   |                    |                    |                      |
| <i>C. japonica</i>   | 25 (42)            | 30 (47)           |                    |                    |                      |
| <i>C. brenneri</i>   | 24 (43)            | 27 (47)           | 24 (39)            |                    |                      |
| <i>C. tropicalis</i> | 29 (46)            | 30 (48)           | 27 (42)            | 32 (49)            |                      |

**B Full-length DPY-27**

|                      | <i>C. briggsae</i> | <i>C. elegans</i> | <i>C. brenneri</i> | <i>C. tropicalis</i> |  |
|----------------------|--------------------|-------------------|--------------------|----------------------|--|
| <i>C. briggsae</i>   |                    |                   |                    |                      |  |
| <i>C. elegans</i>    | 38 (56)            |                   |                    |                      |  |
| <i>C. brenneri</i>   | 34 (50)            | 38 (56)           |                    |                      |  |
| <i>C. tropicalis</i> | 35 (54)            | 38 (54)           | 36 (52)            |                      |  |

**C**

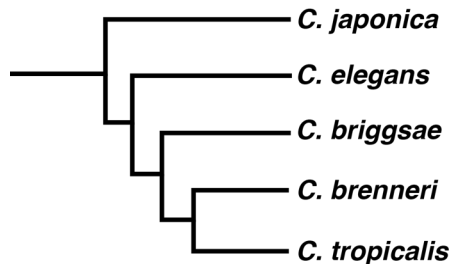

Supplement: supp [file elife-85413-supp-v1.zip]
