# Supplementary material for: X-chromosome target specificity diverged between dosage compensation mechanisms of two closely related Caenorhabditis species
Source: eLife journal article supplement (doi:10.7554/elife.85413), 2023-03-23
Supplement: supp [file elife-85413-supp-v1.zip]

Figure 1—figure supplement 4—source data labeled

**A**

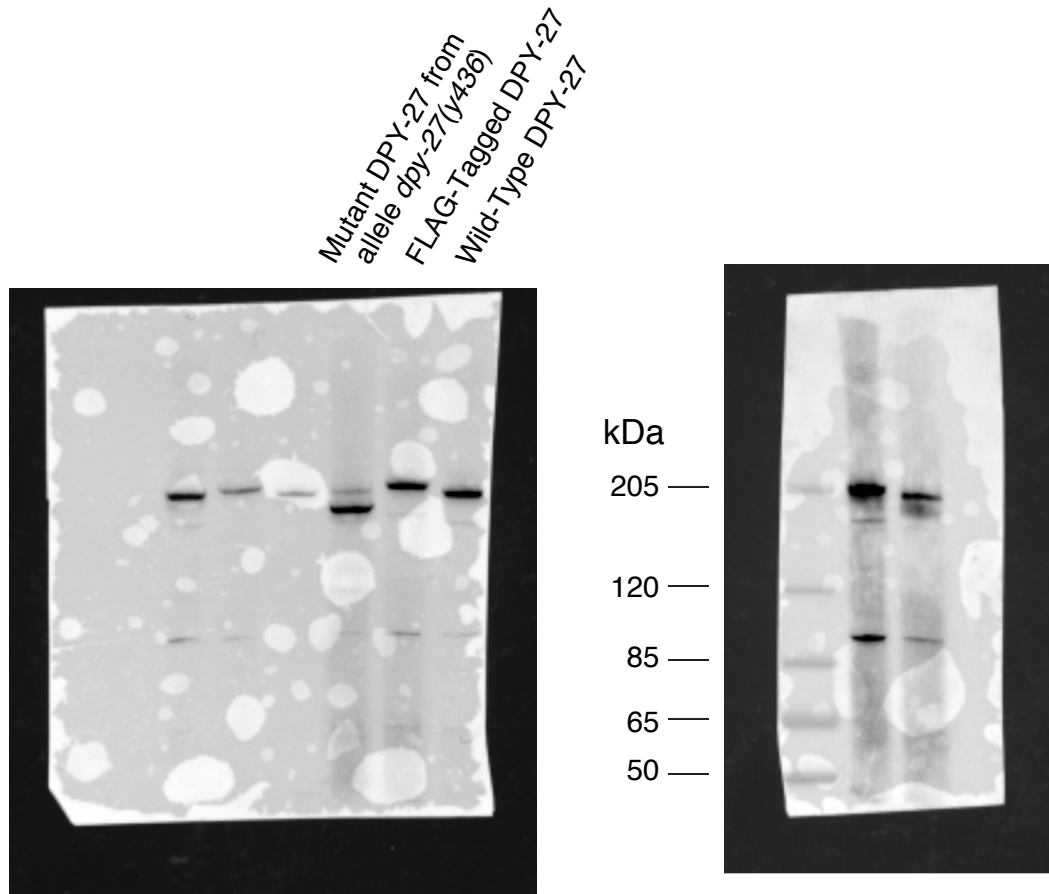

Merged images of chemilumescence and visible channels  
(These two blots derived from a single nitrocellulose membrane after the gel transfer.)

**B**

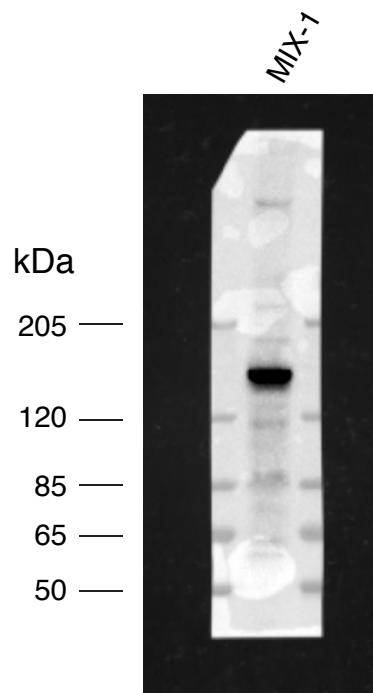

Merged image of chemilumescence and visible channels
