# Supplementary material for: X-chromosome target specificity diverged between dosage compensation mechanisms of two closely related Caenorhabditis species
Source: eLife journal article supplement (doi:10.7554/elife.85413), 2023-03-23
Supplement: supp [file elife-85413-supp-v1.zip]

Figure 11—figure supplement 1

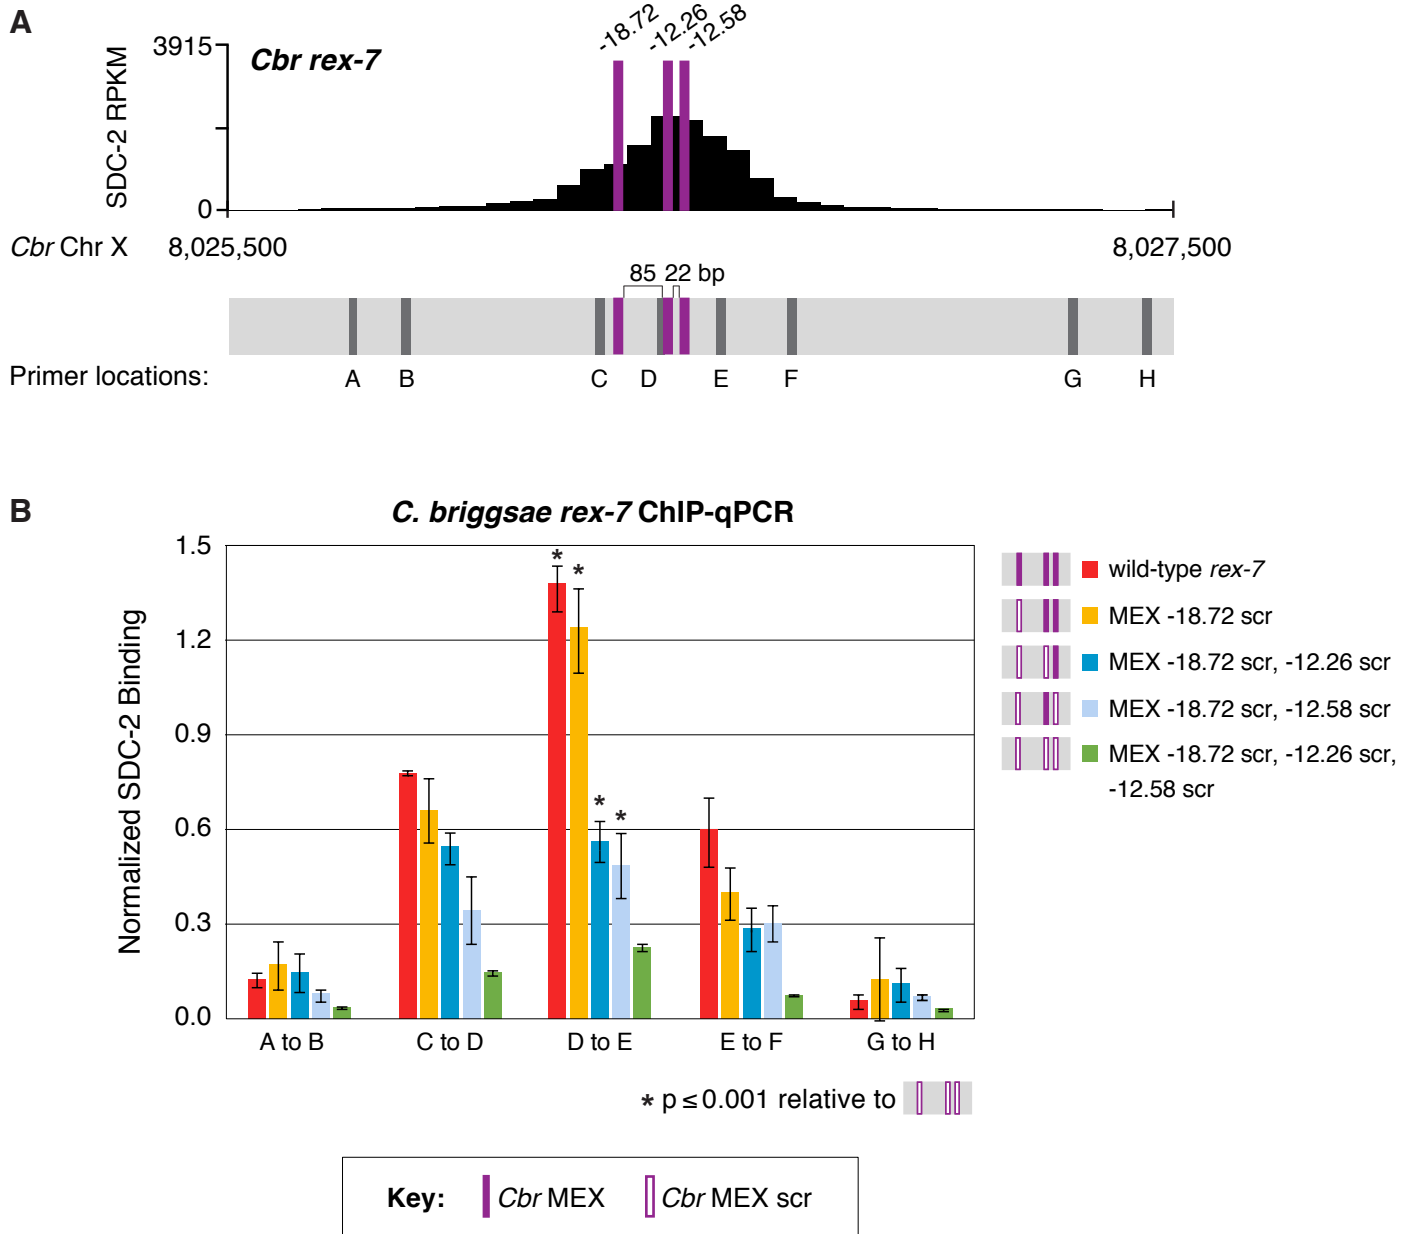

**C**

| Motif                             | Sequence      |
|-----------------------------------|---------------|
| <i>Cbr rex-7</i> MEX (-18.72)     | TATATGGGCAGGG |
| <i>Cbr rex-7</i> MEX (-18.72) scr | GTGAGCAGTAGTG |
| <i>Cbr rex-7</i> MEX (-12.26)     | GAATGCGGCAGGG |
| <i>Cbr rex-7</i> MEX (-12.26) scr | CACGACGACGCGA |
| <i>Cbr rex-7</i> MEX (-12.58)     | TAATTGGGAAGGG |
| <i>Cbr rex-7</i> MEX (-12.58) scr | AGTCAGTGTGAGA |
