# Supplementary material for: X-chromosome target specificity diverged between dosage compensation mechanisms of two closely related Caenorhabditis species
Source: eLife journal article supplement (doi:10.7554/elife.85413), 2023-03-23
Supplement: supp [file elife-85413-supp-v1.zip]

Figure 9—figure supplement 1

A

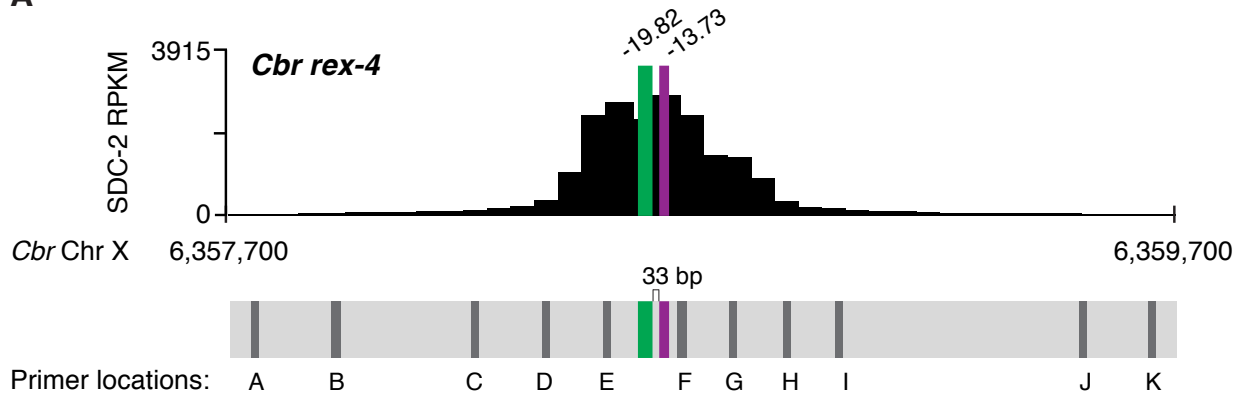

B

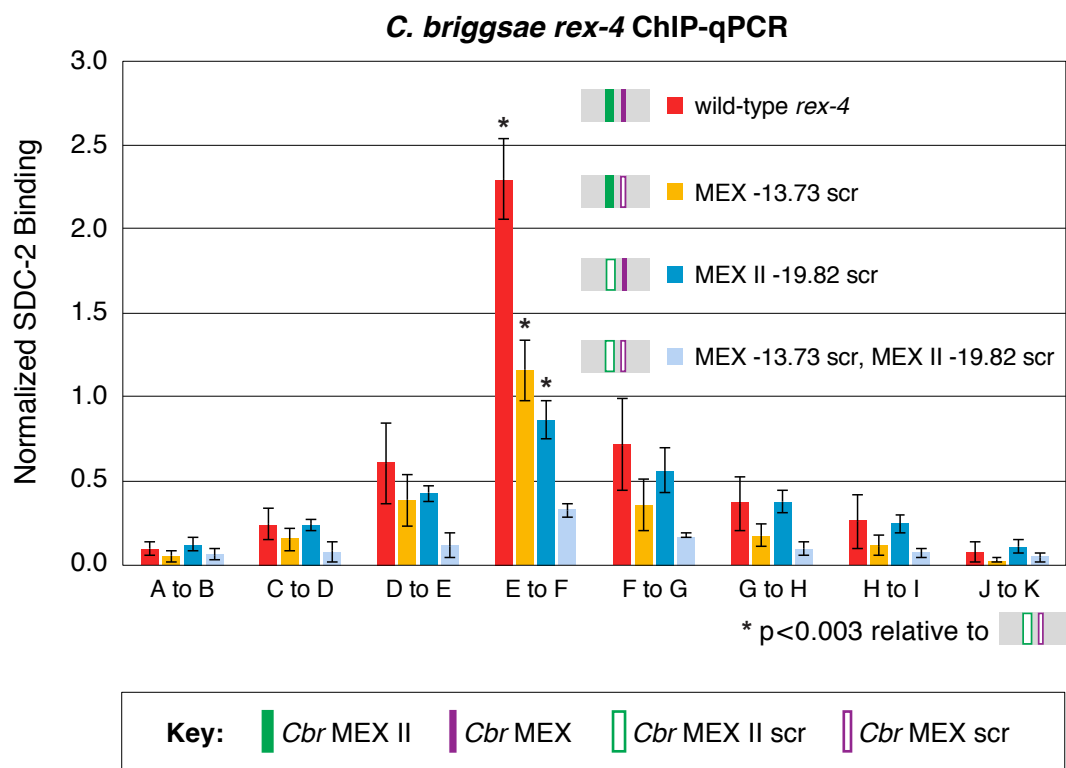

C

| Motif                                | Sequence                       |
|--------------------------------------|--------------------------------|
| <i>Cbr rex-4</i> MEX (-13.73)        | TATATGAACAGGG                  |
| <i>Cbr rex-4</i> MEX (-13.73) scr    | GATAAGTGATGAC                  |
| <i>Cbr rex-4</i> MEX II (-19.82)     | TCTCTGCGCGTATGGCCAATTGGCATGGGC |
| <i>Cbr rex-4</i> MEX II (-19.82) scr | TGCTGCTGCAGTCACTGTGCTCGCTCTGAC |
