# Supplementary material for: X-chromosome target specificity diverged between dosage compensation mechanisms of two closely related Caenorhabditis species
Source: eLife journal article supplement (doi:10.7554/elife.85413), 2023-03-23
Supplement: supp [file elife-85413-supp-v1.zip]

Figure 1—figure supplement 1

|                    |      |  |                                                                                                          |
|--------------------|------|--|----------------------------------------------------------------------------------------------------------|
| <i>C. elegans</i>  |      |  | MDKTGRTRQLSESSSQESVAVITVVPSPAQPKQKLNQHHKKQKDGERRKREQQKDRDLDAITLVNDRRQRPQASASASLQTAYVSPKKHFVRNRPSPMAV     |
| <i>C. briggsae</i> | 1    |  |                                                                                                          |
| <i>C. elegans</i>  |      |  | PSPKKSNPVSHEKSRSLSTSHSPIQKPIQKSIQKPPTSDACASTSFHQNPASAKLIPYIPRSPKSGPKHSVTFRHPISSHQSSLSHSHEDSPPTATTYPTSLAK |
| <i>C. briggsae</i> | 101  |  |                                                                                                          |
| <i>C. elegans</i>  | 1    |  | ...MDESE.LGNQSESMESFESDSDP...EADPDVVIHDIHHLRA...EADPDVVIHDIHHLRA...                                      |
| <i>C. briggsae</i> | 201  |  | LSASVDHYQQSIQSSSQQLTPREQEITSILQNSSSQSETSQKQKTVDVYS...NDEFLQPVLPKQSKKPQQRPOQKIEKSHHPRVSVSSVDMNTKYRA       |
| <i>C. elegans</i>  | 42   |  | ..TGDYSOSEICKLPEQNTFFLPGRVKNISNDSDSVITDEDEIDGAIKITSDTHFICSSRTSELGDF...EMDEQEEFNITTEFN.CNEQBL             |
| <i>C. briggsae</i> | 299  |  | VLAEDDEESQDQSSRSQD...SS.SPEFTRTVKSQNO...KMAQCKHNSGCHDSCATSSSQNEQRRKRAQLSKKVLSVVVEPDEGADDBE               |
| <i>C. elegans</i>  | 132  |  | BEHLRNAYRHEEEECFEEEDDIEFPL...PNRSRDRDATRPPKSRSEKSKKQNRSRSTPSREPSVVIDEEDAPFKKRTTRRKKEKDPMDVQTRRKMRRTI     |
| <i>C. briggsae</i> | 382  |  | ETPPREI...QVSGGSBDSDIEFPL...PNRSRDRDATRPPKSRSEKSKKQNRSRSTPSREPSVVIDEEDAPFKKRTTRRKKEKDPMDVQTRRKMRRTI      |
| <i>C. elegans</i>  | 192  |  | EVDHDPHPVNYRMKPAVTDDGKVVEOKRTRVTRNIMSHITPOYHLEGEETEFGRVKESTLSKTIEOYIQAQKLVSPKCDQFREQIVATAVEYDGSVKML      |
| <i>C. briggsae</i> | 478  |  | HIVYGRPRPVKRMKAITIKKYRALHOKRTRVTRNIMSHITPOYHLEGEETEFGRVKESTLSKTIEOYIQAQKLVSPKCDQFREQIVATAVEYDGSVKML      |
| <i>C. elegans</i>  | 292  |  | QFENALKKHSGKOKRLKYOTWWKASKSHYERAVNGYVAMP...KTPVLS.SDDPVLYKHSLPKNQSEPEKINVQLRIRLNSKRONNDVLPDSYFV          |
| <i>C. briggsae</i> | 577  |  | HFGRTHMKHSGKOKRLKFOMSWWPKDTPDEKLRKGGLRTRITCTYTPYRIDDDVLYKHSLPKNQSEPEKINVQLRIRLNSKRONNDVLPDSYFV           |
| <i>C. elegans</i>  | 389  |  | REFLMQKHSISLRNVNRSDDIEFVFPPTLECGYVQDQAVTVQOEHLMMMPFEADDEYNIRYRSIAPPVEQVGTISAKELHKFHRGRHHGFFVVM           |
| <i>C. briggsae</i> | 677  |  | REFVLGKAFISLRNVNRSDDIEFVFPPTLECGYVQDQAVTVQOEHLMMMPFEADDEYNIRYRSIAPPVEQVGTISAKELHKFHRGRHHGFFVVM           |
| <i>C. elegans</i>  | 489  |  | ENKPEYDLSGICCPFRRLVDMFNLICFPLIYTYEQVESRLRVAFDKTIVNLHLSEILRCNRPVDFLSKKNPQLPILKEVYLFLEQSNMDAKSFA           |
| <i>C. briggsae</i> | 777  |  | EKIGRCNVQKLKRYTNRLVDMFNLICFPLIYTYEQVESRLRVAFDKTIVNLHLSEILRCNRPVDFLSKKNPQLPILKEVYLFLEQSNMDAKSFA           |
| <i>C. elegans</i>  | 589  |  | VKFLRTPYDHRATSNKDYLSAFLITGAKVTEID...SERLRFVNSDYMEGVLISGSDVYTFEFDKIPNNQITISICNADGVAEMQEDVRHMLS            |
| <i>C. briggsae</i> | 877  |  | ESCGRPRPVKRMKAITIKKYRALHOKRTRVTRNIMSHITPOYHLEGEETEFGRVKESTLSKTIEOYIQAQKLVSPKCDQFREQIVATAVEYDGSVKML       |
| <i>C. elegans</i>  | 687  |  | NCSKRTITIGTSKPEKTIARPVLTNNQNDGMKFFFRKRTMOVRNINIVIP...KPKKVKNKPKPARKKKPKRKPQVDRGLKXHDPILYMASDIESD         |
| <i>C. briggsae</i> | 976  |  | PEEQVITNLTADPCPTVTPOEAPKKTIVRLRTTVMFRKRTMOVRNINIVIP...KPKKVKNKPKPARKKKPKRKPQVDRGLKXHDPILYMASDIESD        |
| <i>C. elegans</i>  | 787  |  | FEGLYSDSENVQKPSKLMRSTSSSVFADYQREKMLDVSWHOKMIDRSLPLKKRRKKMNRRIYKHHSVRYNMIQANGCAETEMRYCYDKILPCGT           |
| <i>C. briggsae</i> | 1074 |  | FEGLYSDSENVQKPSKLMRSTSSSVFADYQREKMLDVSWHOKMIDRSLPLKKRRKKMNRRIYKHHSVRYNMIQANGCAETEMRYCYDKILPCGT           |
| <i>C. elegans</i>  | 887  |  | KEARTKNAIRPFRRLVDMFNLICFPLIYTYEQVESRLRVAFDKTIVNLHLSEILRCNRPVDFLSKKNPQLPILKEVYLFLEQSNMDAKSFA              |
| <i>C. briggsae</i> | 1174 |  | KEARTKNAIRPFRRLVDMFNLICFPLIYTYEQVESRLRVAFDKTIVNLHLSEILRCNRPVDFLSKKNPQLPILKEVYLFLEQSNMDAKSFA              |
| <i>C. elegans</i>  | 987  |  | QKMSGRCLTFESARKDQONNVDMKINDVMDLPLKEHFEISQSIROSKINESLSEVERNREQLAKTLTKTPMDKSOALAREEKKRRESKRLADKY           |
| <i>C. briggsae</i> | 1272 |  | VMPGRMTRMEFEPKRNRESVQSYTNVMSLDHERRLDKAKIRNQKDRHIALQONVYFERMKNLSKROGFLRYDQSSLOQHKHEEARLNRKHSBKE           |
| <i>C. elegans</i>  | 1087 |  | ...AEQRNMASTRLLEKRTT...OKQVDPETQRLRRPDKTVRRHITKNLFGSKKVIIRSLAAGKPAASLSEDS.DSEDSRESPVAEFLPT.N             |
| <i>C. briggsae</i> | 1372 |  | TAFRKEQYIALKAAGDVPTKEWIKRRIQEEBAEAAKDRKABEBOREKRRMQIEAARLLKEKERRKAAIEKPKLDAVATK...L...KEXDE              |
| <i>C. elegans</i>  | 1173 |  | QEEBRIEMETILTNR...VREBEEKMLERTRKABERERQERLKRREBEEERKLEQLREAEKLKAEIEBENKLOEBERTKALEBERK...IEBERK          |
| <i>C. briggsae</i> | 1464 |  | RERKRIEMETILTNR...VREBEEKMLERTRKABERERQERLKRREBEEERKLEQLREAEKLKAEIEBENKLOEBERTKALEBERK...IEBERK          |
| <i>C. elegans</i>  | 1267 |  | VSTL...KDMFGFLPFAENEQTEKDFQITDDHETLTTISDPTNEKYQARTEFERLIDIKSMLIRKAB...LIDVYTIHYDVPTQTCRVTSSIESNE         |
| <i>C. briggsae</i> | 1563 |  | RQEEETAKSLAAVQIPKTVT...TSLYRQAQKLDEMTATAPEKTY...R...TVMLVIRESEDKFGAFTRKTRNFNLRVETAYPEFRFF..DK            |
| <i>C. elegans</i>  | 1364 |  | NRMVNEINLKFENFANCFPTFNIQDGENGLQSKRKWDFQFKCAVFDGVSQSTVNFTEKMENTKXKHLATPKTVISIDTSLKQSLRSRSHRDPDI           |
| <i>C. briggsae</i> | 1646 |  | NRMVNEINLKFENFANCFPTFNIQDGENGLQSKRKWDFQFKCAVFDGVSQSTVNFTEKMENTKXKHLATPKTVISIDTSLKQSLRSRSHRDPDI           |
| <i>C. elegans</i>  | 1464 |  | SLYAQNHANSIGDVTLMKSNYSLDFATQSHDKELAKKATPTPKGFVRRHITKNLFGSKKVIIRSLAAGKPAASLSEDS.DSEDSRESPVAEFLPT.N        |
| <i>C. briggsae</i> | 1722 |  | EPSPEPES...EILADSLS.SDDADGDEL...LPEAYETGQTDLTATHW.SRSPSVSDQDDESQNSYKOR...CPEHMAVA                        |
| <i>C. elegans</i>  | 1562 |  | PVCSFWRLLVVKIENSTTDKKEITELCELDLKLITERRKDDLFSSKILKMMVGLVATFYVILSNVNLNENEBIIS...DKNQGVTKDEIKSTNDMLITA      |
| <i>C. briggsae</i> | 1794 |  | LSFWRLLVVKIENSTTDKKEITELCELDLKLITERRKDDLFSSKILKMMVGLVATFYVILSNVNLNENEBIIS...DKNQGVTKDEIKSTNDMLITA        |
| <i>C. elegans</i>  | 1656 |  | AYFEEGSERSNIRKMLISMGPSVFNRYIL...FAKKTAK...EIESNRLSGVYVIEDPESLAEETIRKQELSSVRKTGKLEBEE                     |
| <i>C. briggsae</i> | 1894 |  | VVEHQANSPNLKQLCKWNGPROACDLIDELYEFGMGVYCLQLDQVFKDEBIDETK...IREAPRTATKVFVPLSVHCG...VKRSQVAKWRVEE           |
| <i>C. elegans</i>  | 1746 |  | IVK...LIQNE...KKLA...LSHKSHDENRRFRRLNIVVKKYDAITICHCEELQAIIVDAFPLNATFKNKRTSHV...AMNENG                    |
| <i>C. briggsae</i> | 1986 |  | VTIGRCCVNTTEYKQPTVNTTNEFILKQNAQFSSRITATLVNXYQYLVKCGSKITEDMRSNAM...NATAWKRRQYHMSMPMPATSDQEEDEESPIKITIP    |
| <i>C. elegans</i>  | 1819 |  | DDENLSDTS...DNQMSDTPOMPKN...CRNSBIFPEDAFQAKYAVVRTPSKERQAQMSLPSYKKNNAQ                                    |
| <i>C. briggsae</i> | 2084 |  | DDVNLISPRKVTPTTLTPTPTLHVYKDEVIDKKNNGKDAAESATVRHVVSFYQHFFVQNLGQLGVCQQQSTVYVSGSYNLSSEKEXEKKIKRLIERRE       |
| <i>C. elegans</i>  | 1884 |  | SGCVENKGLSRMKFEPFVDSVWRTIERKINNMTHSEEEKQKRRFIPVSRSHKLEKNEKVFYAMVMIQERDSBTRLFNSKFQDDNMLHCVSKSLENHE..      |
| <i>C. briggsae</i> | 2184 |  | IEKENSLNLPISDAMFINLWRAIERKISVFPGGIKMTGLHKKLQRPHEIDSEFRTIIM...SRDAGKRFPPEEPYKHDHFKYTRISTEPKRY             |
| <i>C. elegans</i>  | 1982 |  | KMSRITIOHIEHTVSNLQCNVGMKMDATHYFTDLYKYRSESEFRSALGCKKKNFVVTILWFMGNLPTSYNPDSDHDDGF.VP.SG                    |
| <i>C. briggsae</i> | 2280 |  | QAYEDTITNSFPEIMCKTEPRKMONTVPRQFGPPKATIEFTDLYKYRSESEFRSALGCKKKNFVVTILWFMGNLPTSYNPDSDHDDGF.VP.SG           |
| <i>C. elegans</i>  | 2080 |  | CTSDVILTHKCCAYENDTFSDFKIYANTSLPVGIDKVTIRVGRFVCEHGSSVLIIEHCSANVDANIPF.ESENVFESFEILRVKRTMHSILVKPFA         |
| <i>C. briggsae</i> | 2380 |  | CTSDVILTHKCCAYENDTFSDFKIYANTSLPVGIDKVTIRVGRFVCEHGSSVLIIEHCSANVDANIPF.ESENVFESFEILRVKRTMHSILVKPFA         |
| <i>C. elegans</i>  | 2179 |  | EETHLRDRASRRAISTVTLDSGSGSRSTCEIFEDSPSEDENQOLDTRTGRKIDILVDSDKALIAEGERALRIKRLDLP...E.LQKFR                 |
| <i>C. briggsae</i> | 2480 |  | NVPQTIRERSQESTT...NSDSSGSDTSL...QNSVDFEGNPLIVSKVQENIVENAKE...LYKRFSEIKCKKITLDKPKKMRTR                    |
| <i>C. elegans</i>  | 2271 |  | SKNFVSRSKSVDAKPTSQKQTVIRRSOSVCDLNDVNEYAKKVRNTDSPAFLTRFDHEXSTRTYEOLNNEILDVVTTCGASNVSAKKNVTLASTLA          |
| <i>C. briggsae</i> | 2558 |  | SKNFVSRSKSVDAKPTSQKQTVIRRSOSVCDLNDVNEYAKKVRNTDSPAFLTRFDHEXSTRTYEOLNNEILDVVTTCGASNVSAKKNVTLASTLA          |
| <i>C. elegans</i>  | 2371 |  | FEKEVQLVNDKN.GELFKTVSNLVQRNSTOHVKGVLAEADNQTLRS...TNDTSEVFPESKAVNLEYLKEIKKKMMVNALMDATVKTDLKXHAEPVRF       |
| <i>C. briggsae</i> | 2646 |  | LGPAAEEPTAKYCKTRVIKIQEHLKQHSRMY...GQDKENVPFRFDEKPKFGGQPSALMHEVYAEPMQIKRTVRAKNHVAANRRARFNEAQF...          |
| <i>C. elegans</i>  | 2467 |  | AKLLATVDSIFKFNVLFEPELNCISKHFNPAAYCEBTPTGTESKPKOLTILKETSMPVLSMLFNTEPRLROHSIETSHKKVRESDEACTASTL            |
| <i>C. briggsae</i> | 2739 |  | EYFHTIKVQPNLNLHFEHLHQISKHFNPAAYCEBTPTGTESKPKOLTILKETSMPVLSMLFNTEPRLROHSIETSHKKVRESDEACTASTL              |
| <i>C. elegans</i>  | 2567 |  | CRYAETERIRVPOADKRLCDFSNASAEDEHREVSFILTLEHEDPDMKTEQOT...RFEVFLKEAEFGHFSYKFVEAOCTFVRNHGDSKQAFETAPYN        |
| <i>C. briggsae</i> | 2836 |  | GRYAETERIRVPOADKRLCDFSNASAEDEHREVSFILTLEHEDPDMKTEQOT...RFEVFLKEAEFGHFSYKFVEAOCTFVRNHGDSKQAFETAPYN        |
| <i>C. elegans</i>  | 2665 |  | QNDFAFYGLQKPMNSGIDTPKMKLYOHOAFIRLHNIVKRSRHIITSDDYHRSVSVCKAMLLSEIVSNPKIAQEAFTSGSVLDNRNYSCKIKAKMPLIS       |
| <i>C. briggsae</i> | 2927 |  | QNDFAFYGLQKPMNSGIDTPKMKLYOHOAFIRLHNIVKRSRHIITSDDYHRSVSVCKAMLLSEIVSNPKIAQEAFTSGSVLDNRNYSCKIKAKMPLIS       |
| <i>C. elegans</i>  | 2765 |  | PSYTGTSITCFFDELLFSAVREAKVHTDTR.VVRSKSMRNEKAGDANKCTKVTTLVNLBTALLSMVFSRDOSEIDDDRIDIDILDEYIKPITID           |
| <i>C. briggsae</i> | 3026 |  | PSYTGTSITCFFDELLFSAVREAKVHTDTR.VVRSKSMRNEKAGDANKCTKVTTLVNLBTALLSMVFSRDOSEIDDDRIDIDILDEYIKPITID           |
| <i>C. elegans</i>  | 2864 |  | WNRIFETITOPTYNTFPSRMKRRERVSILPENPLGRLENYATN...PNOD...KDQAVLE...YVDVASDTDAAESIEDPDIIVEMTLKRALP            |
| <i>C. briggsae</i> | 3120 |  | IDGVLFKPVVSQRNKQEQFEMQPOVRFPK.SRRGILENRNIINELVSSDEODKSSSTSSQRMSERTIDPNVYVGLHHTHKLK...HSEVSKNMRREYFI      |
| <i>C. elegans</i>  | 2950 |  | RSMSPSKRR...RRMS                                                                                         |
| <i>C. briggsae</i> | 3215 |  | TNRRPGRSKRSVPPASPHIPPMNPKRIIRFHSKY                                                                       |
