# Supplementary material for: X-chromosome target specificity diverged between dosage compensation mechanisms of two closely related Caenorhabditis species
Source: eLife journal article supplement (doi:10.7554/elife.85413), 2023-03-23
Supplement: supp [file elife-85413-supp-v1.zip]

Figure 8—figure supplement 1

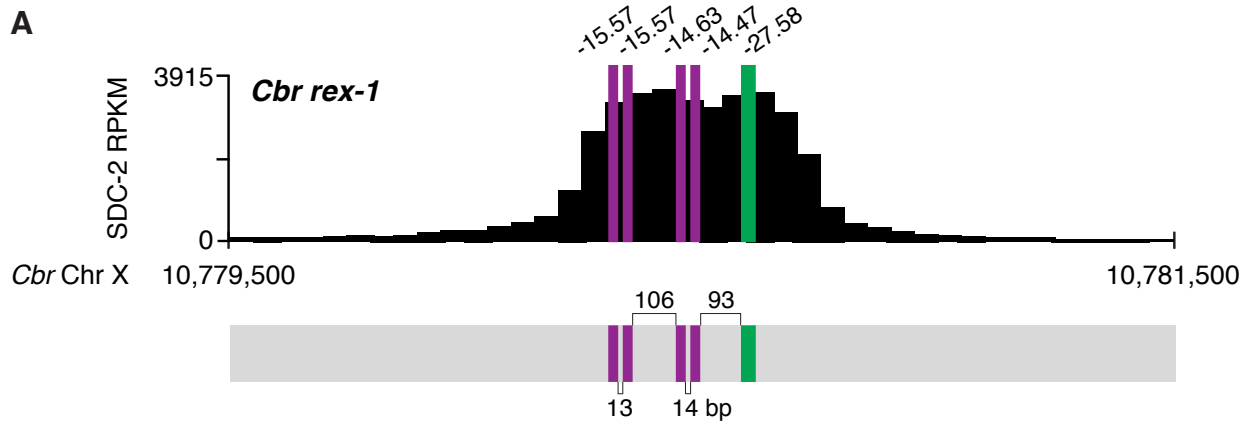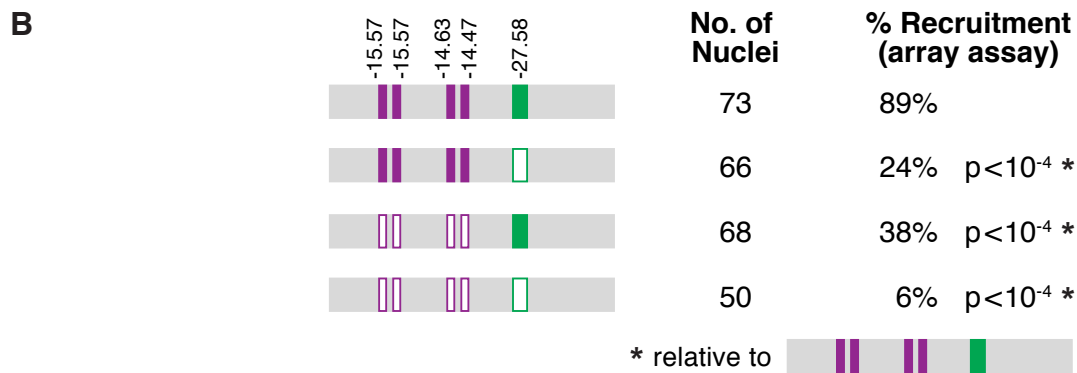

**Key:** █ *Cbr* MEX II █ *Cbr* MEX ▭ *Cbr* MEX II scr ▭ *Cbr* MEX scr

**C**

| Motif                                | Sequence                       |
|--------------------------------------|--------------------------------|
| <i>Cbr rex-1</i> MEX (-15.57)        | TAAAGGGGCAGGGT                 |
| <i>Cbr rex-1</i> MEX (-15.57) scr    | AGAGTGGAGTGGCA                 |
| <i>Cbr rex-1</i> MEX (-15.57)        | TAAAGGGGCAGGGG                 |
| <i>Cbr rex-1</i> MEX (-15.57) scr    | TGAGGAGGAGCGGA                 |
| <i>Cbr rex-1</i> MEX (-14.63)        | CATTTCGCGAGGGC                 |
| <i>Cbr rex-1</i> MEX (-14.63) scr    | ACTGTGCGTCGCAG                 |
| <i>Cbr rex-1</i> MEX (-14.47)        | GATTTCGCGAGGGG                 |
| <i>Cbr rex-1</i> MEX (-14.47) scr    | ATGCGTGCGGTGGA                 |
| <i>Cbr rex-1</i> MEX II (-27.58)     | AGGCTTGCTATATGCCCTTATCGCAAAGA  |
| <i>Cbr rex-1</i> MEX II (-27.58) scr | CGTACTAGCAGTAGTCTCGTAGATACTATC |
