# Supplementary material for: X-chromosome target specificity diverged between dosage compensation mechanisms of two closely related Caenorhabditis species
Source: eLife journal article supplement (doi:10.7554/elife.85413), 2023-03-23
Supplement: supp [file elife-85413-supp-v1.zip]

Figure 10—figure supplement 1

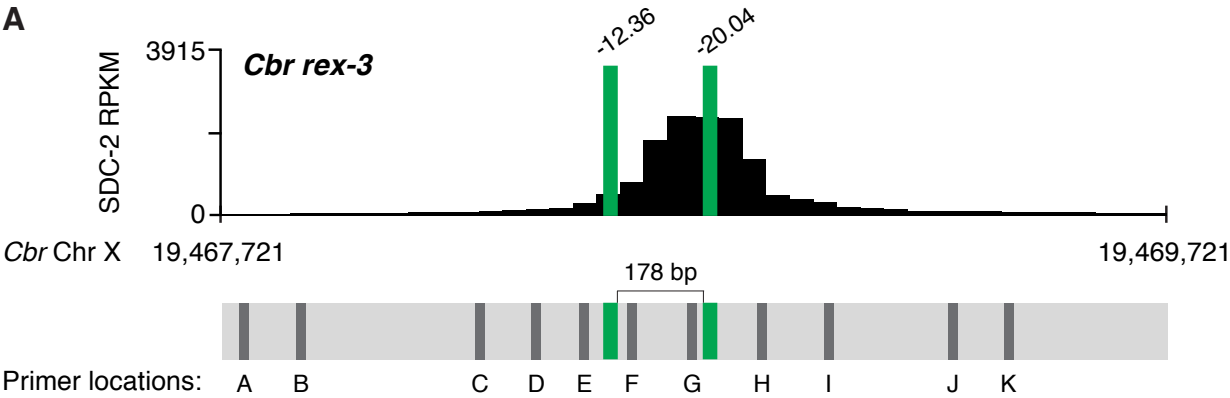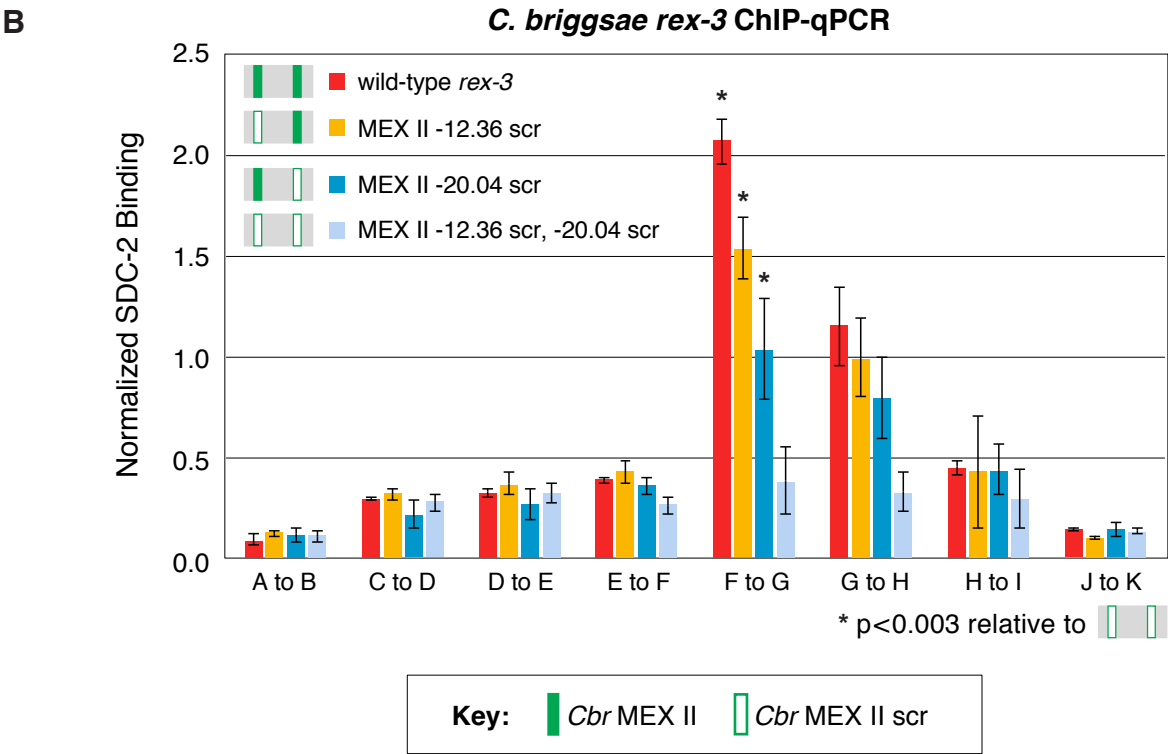

**C**

| Motif                                | Sequence                       |
|--------------------------------------|--------------------------------|
| <i>Cbr rex-3</i> MEX II (-12.36)     | ACTCTGTGAAAATAGGAAATCTACAAAATT |
| <i>Cbr rex-3</i> MEX II (-12.36) scr | TACAGATGTATGATTATCACAGTATTACTA |
| <i>Cbr rex-3</i> MEX II (-20.04)     | ACTTCGCGCGTTGTGGAAGTAGGCAGGAGG |
| <i>Cbr rex-3</i> MEX II (-20.04) scr | GAGCTCGCTGTGCTGACGAGAGCAGCTCAT |
