# Supplementary figures and images for: X-chromosome target specificity diverged between dosage compensation mechanisms of two closely related Caenorhabditis species
Source: eLife journal article supplement (doi:10.7554/elife.85413), 2023-03-23

**Figure 1—figure supplement 3**

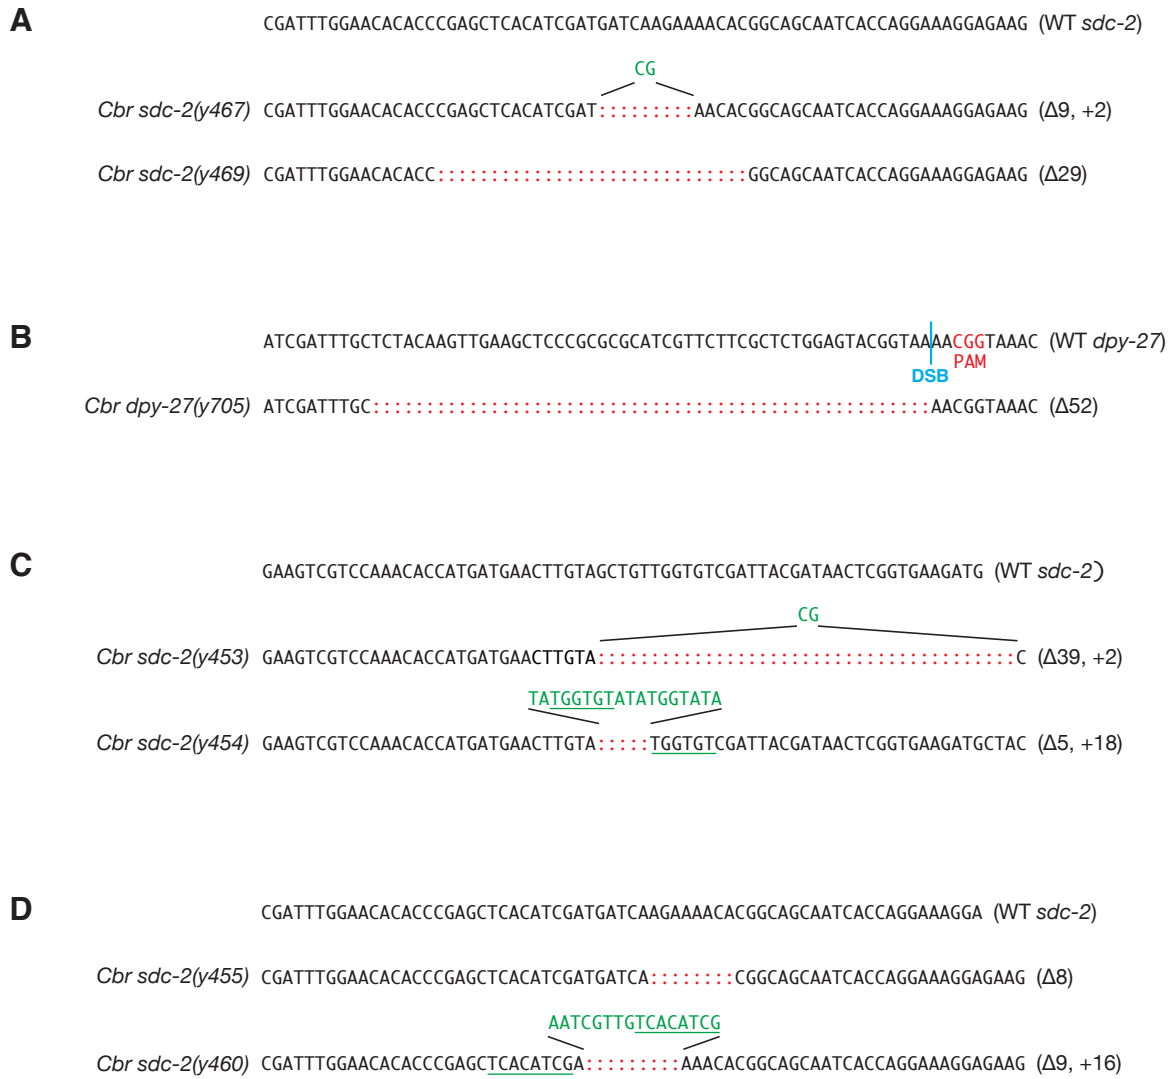

Supplement: supp [file elife-85413-supp-v1.zip]

Figure 7—figure supplement 1

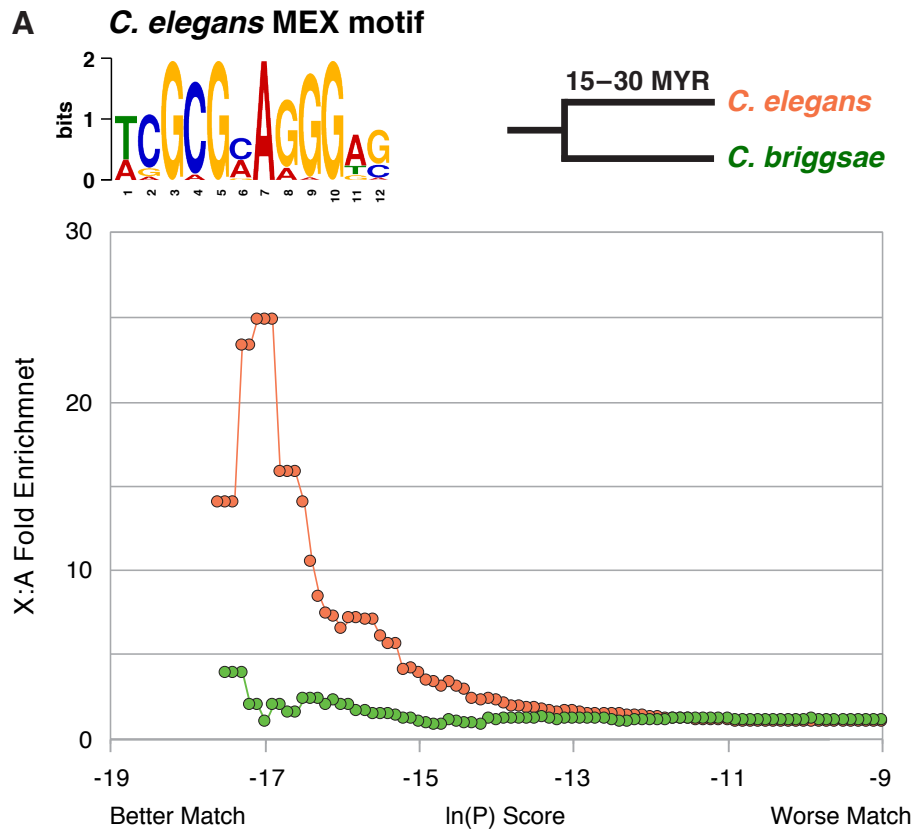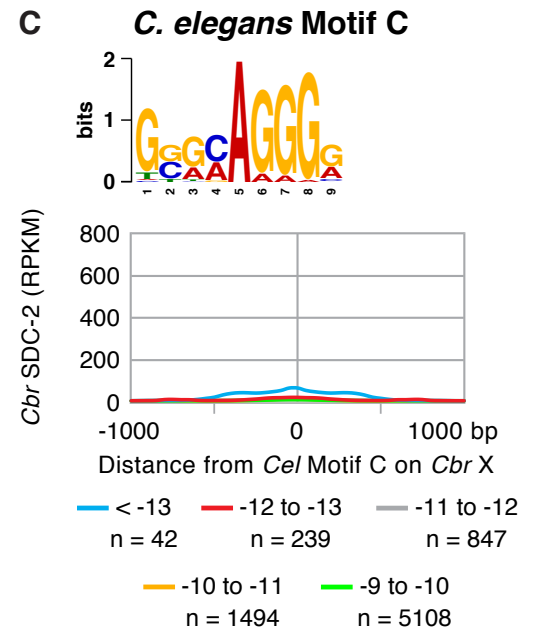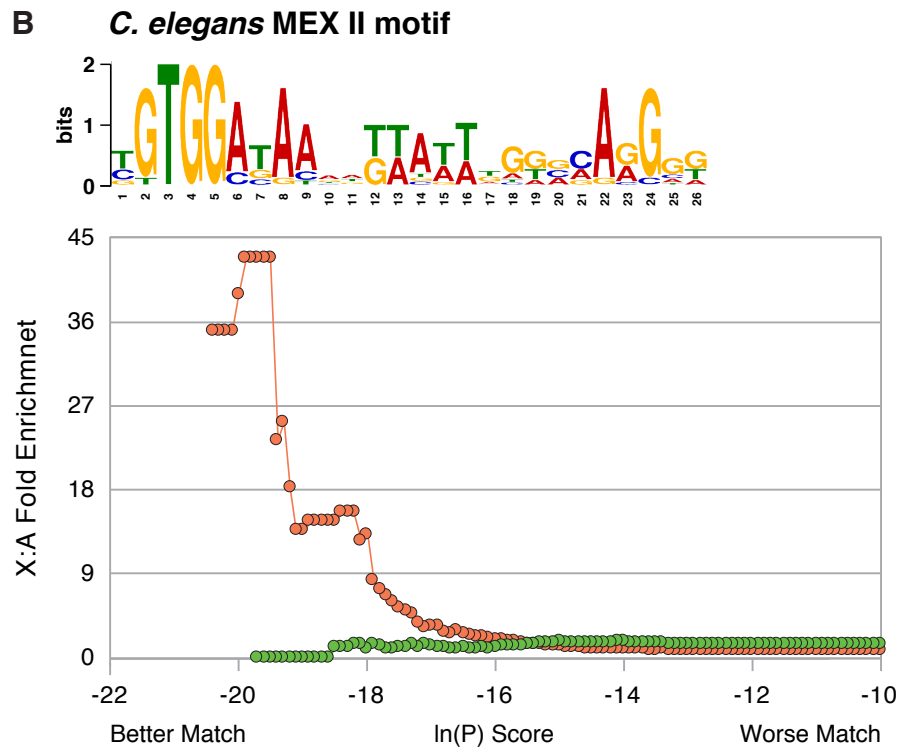

Supplement: supp [file elife-85413-supp-v1.zip]

**Figure 6—figure supplement 1**

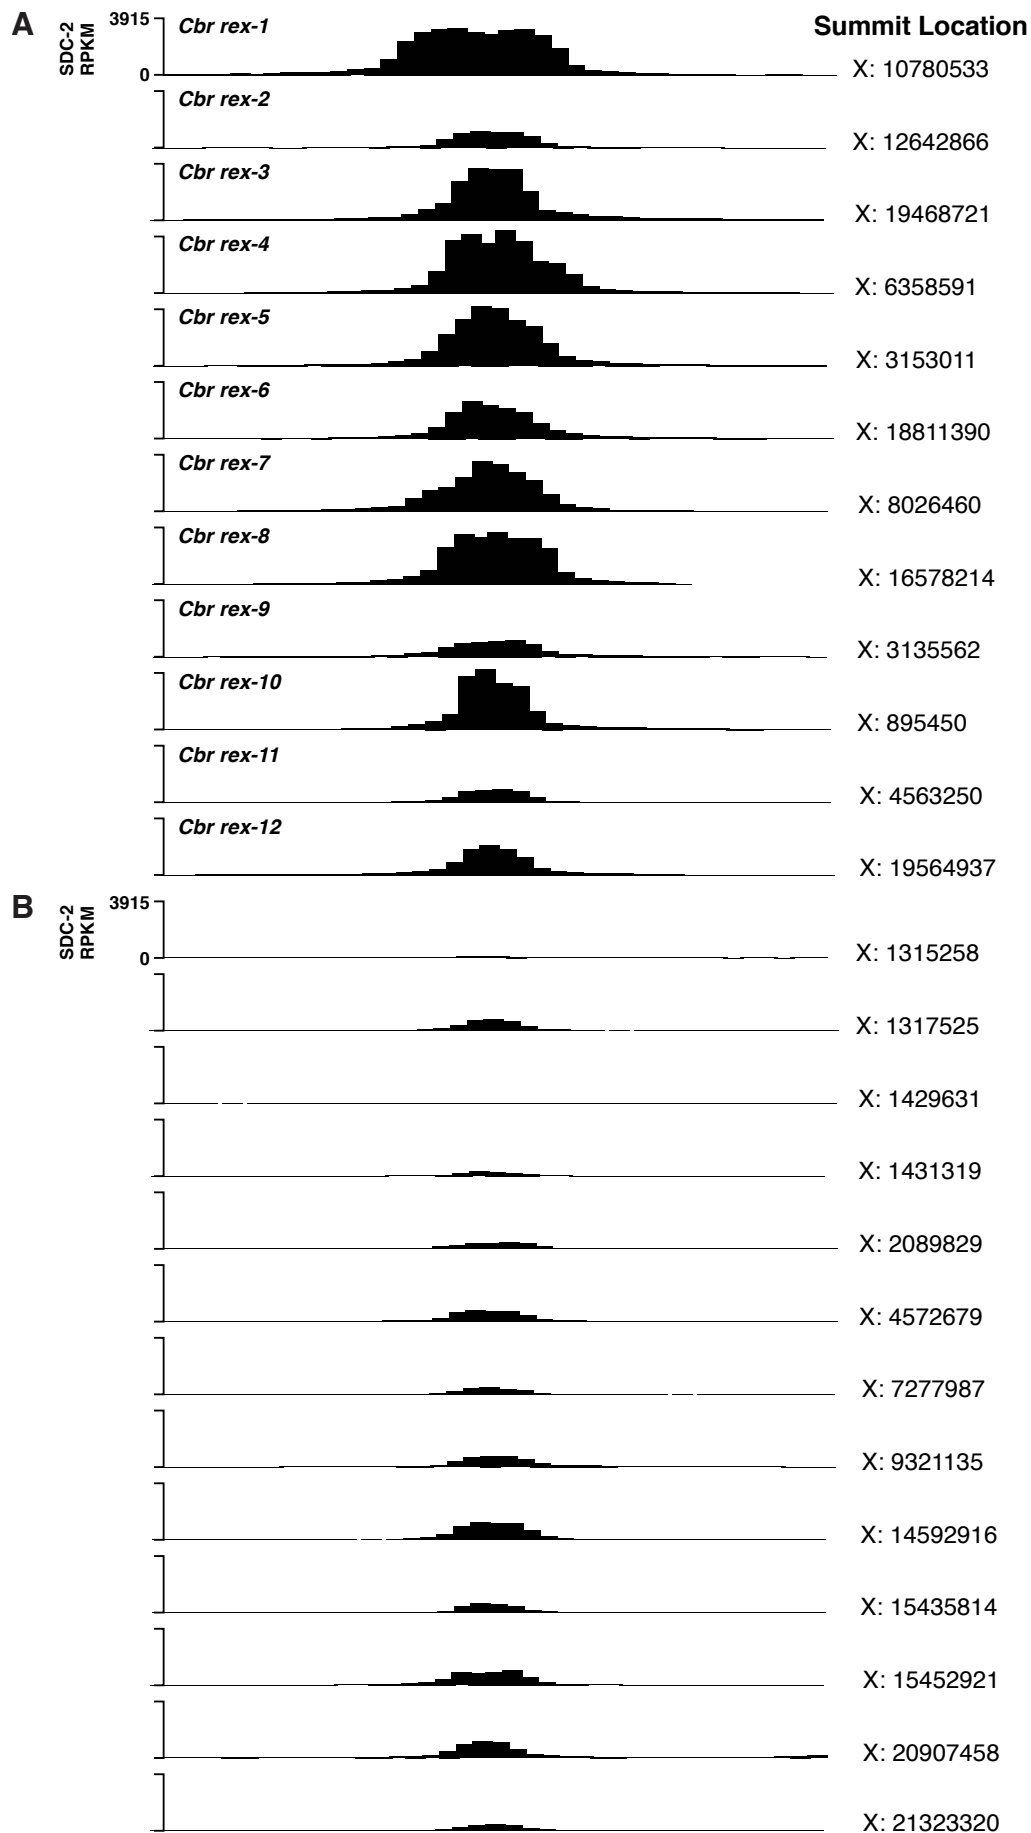

Supplement: supp [file elife-85413-supp-v1.zip]

Figure 1—figure supplement 4

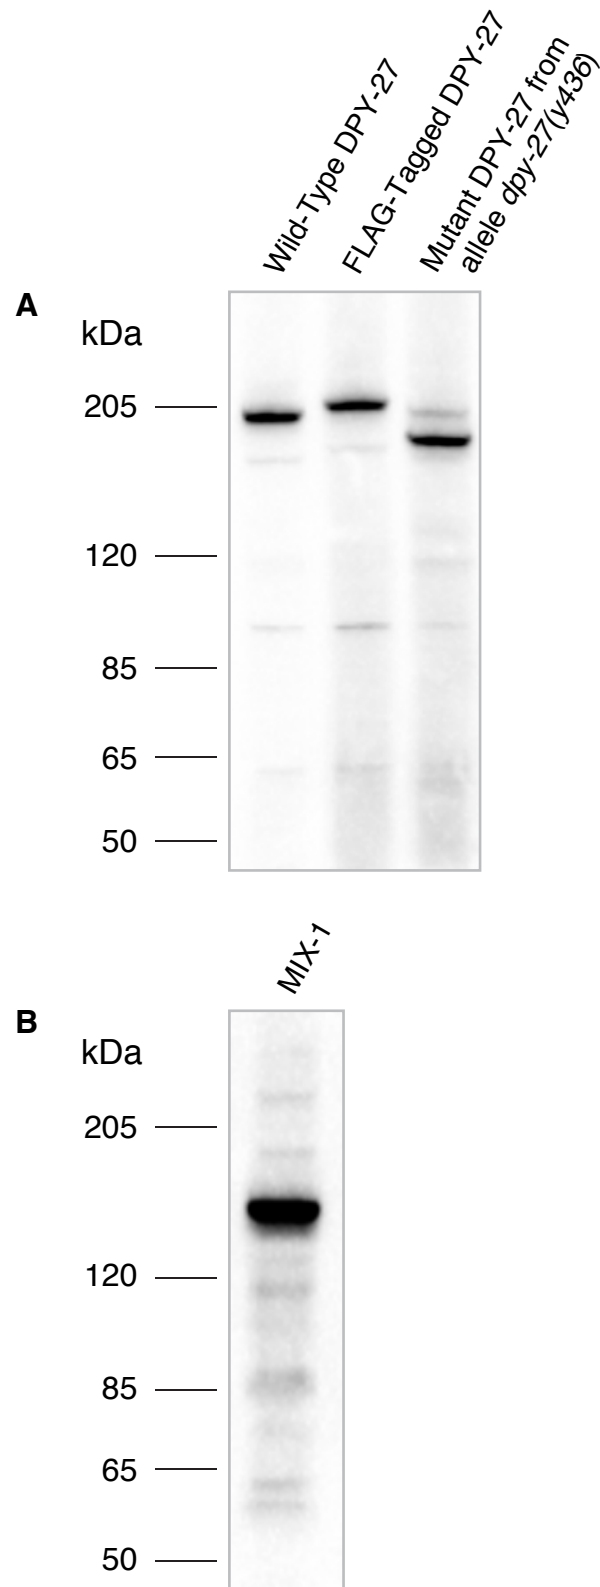

Supplement: supp [file elife-85413-supp-v1.zip]

Figure 4—figure supplement 1

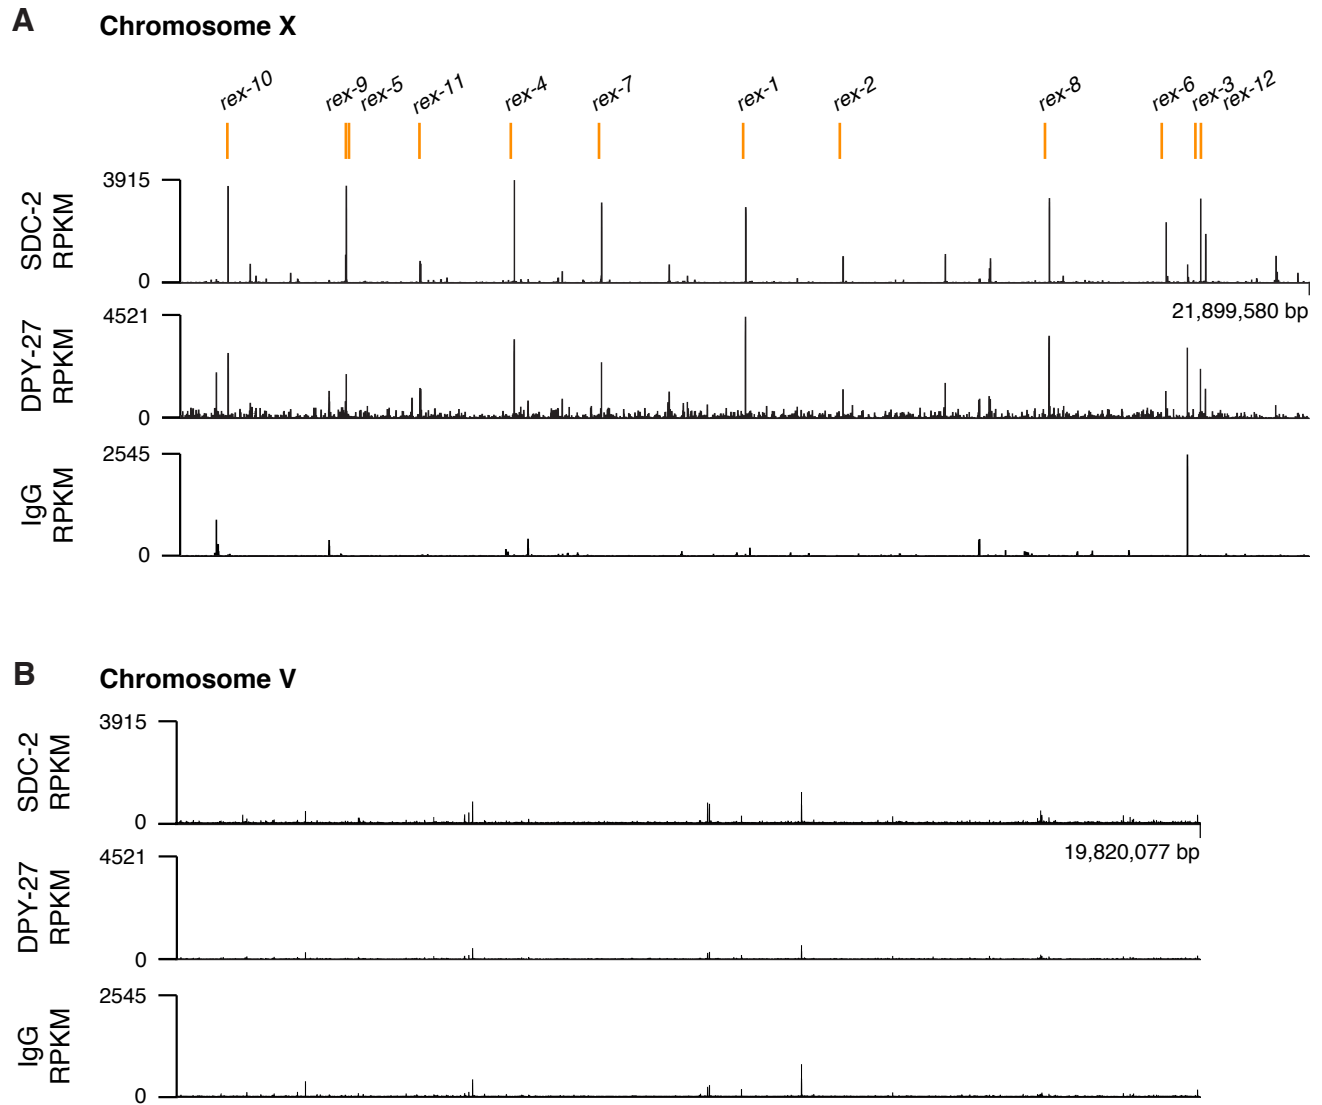

Supplement: supp [file elife-85413-supp-v1.zip]
